# Supplementary material for: Preparation and processing of porous sulfur foams having low thermal conductivity
Source: Royal Society of Chemistry journal article supplement (doi:10.1039/c8ra09127g), 2019-01-01
Supplement: c8ra09127g1.pdf [file c8ra09127g1.pdf]

## Supplementary Information

### **Preparation and Processing of Low Thermal Conductive Porous Sulfur Foams**

Vijay S Wadi, Kishore K Jena, Shahrukh Z. Khawaja, Vengatesan Muthukumarswamy Ranagraj and Saeed M. Alhassan\*

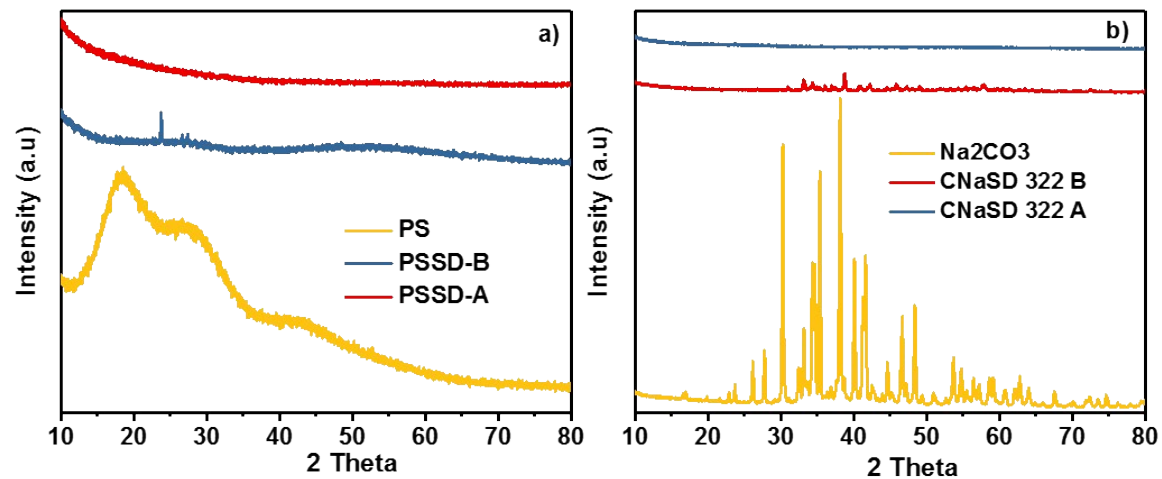

Figure S1 XRD of a) comparison of template PS, and PSSD before (PSSD-B) and after (PSSD-A) water treatment, b) template Na<sub>2</sub>CO<sub>3</sub>, and polysulfide containing Na<sub>2</sub>CO<sub>3</sub> before (CNaSD-B) and after (CNaSD-A) water treatment respectively

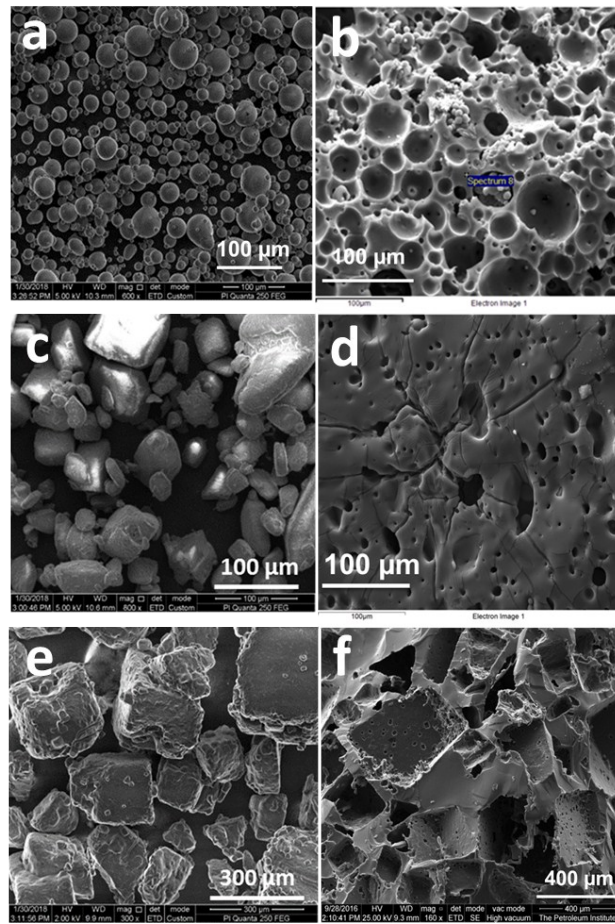

Figure S2 Comparison of templates; (a) PS, (c)  $\text{Na}_2\text{CO}_3$  and (e) NaCl with the corresponding porous foam; (b) PSSD, (d) CNaSD and (f) NaSD respectively. Pores generated in the foam resembles the corresponding templates size and shape

Figure S3 SEM images and elemental mapping of the polysulfides before and after water treatment

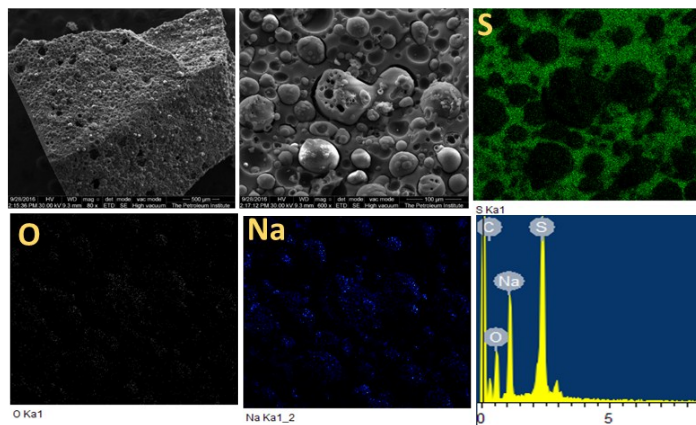

SEM and elemental mapping of PSSD before water treatment, the spherical shape on the surface shows the PS templates in polysulfide. EDX shows the presence of Na and Oxygen peaks

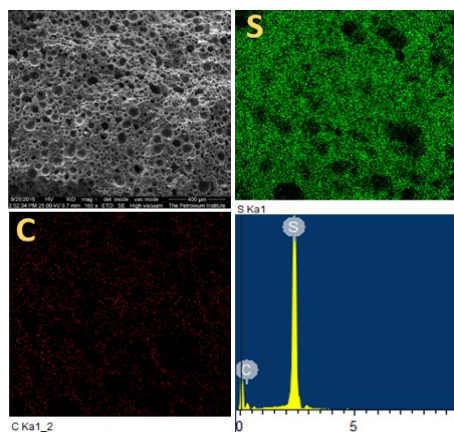

SEM and elemental mapping of PSSD after water treatment, porous structure resembles the template PS size and shapes. EDX show the disappearance of Na and oxygen peaks indicate complete removal of template after water treatment

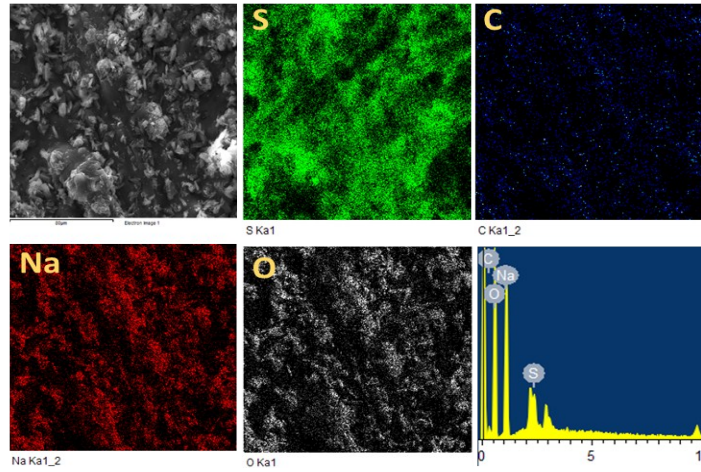

SEM and elemental mapping of CNaSD before water treatment, EDX shows Na, Oxygen are from  $\text{Na}_2\text{CO}_3$  template

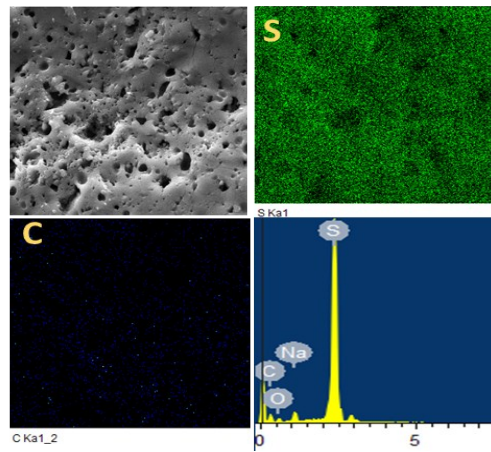

SEM and elemental mapping of CNaSD after water treatment, shows porous structure matching with the template. Significant decrease in the Na and oxygen peaks in EDX indicate removal of template after water treatment

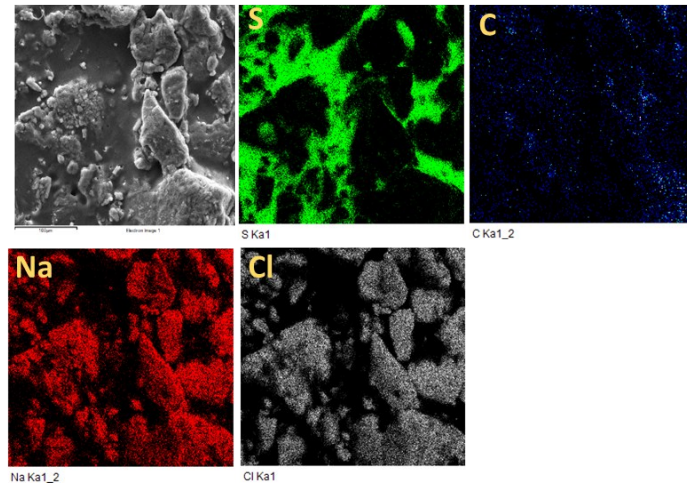

SEM and elemental mapping of NaCl copolymer before water treatment shows the presence of Na, and Cl from the templet

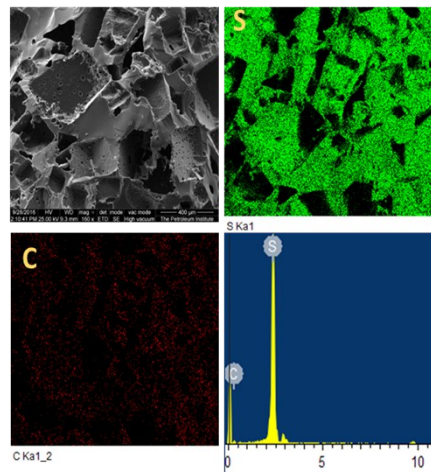

SEM and elemental mapping of NaSD after water treatment, shows porous structure similar to templet size and shape. EDX shows significant decrease in the Na and Cl indicate removal of templet after water treatment
